# Supplementary material
Source: Springer Nature journal article supplement (https://www.springermedizin.de/resource/supplementary/12885_2008_1167_MOESM9_ESM.pdf/9471296)

# Panel A

24h 48h 72h 7h 12h 18h 24h 48h 72h 55h  
U U U M CS M CS M CS M CS M CS M CS TC

BIP

GAPDH

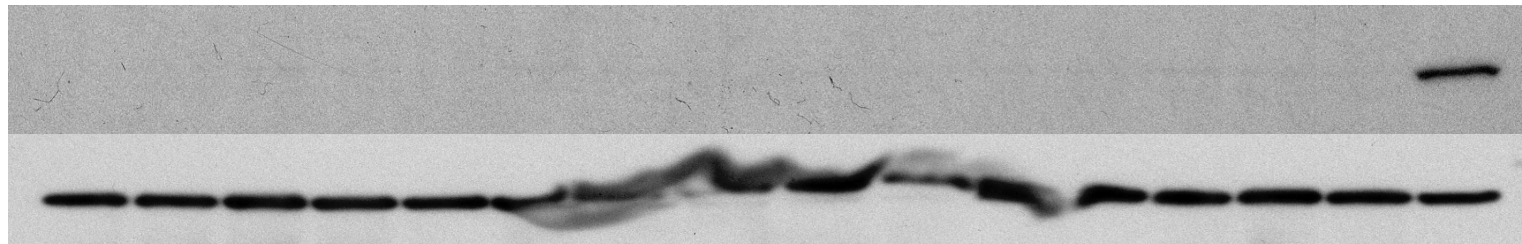

# Panel B

24h 72h 7h 12h 18h 24h 55h 72h  
U U V T V T V T V T V T V T

BIP

GAPDH

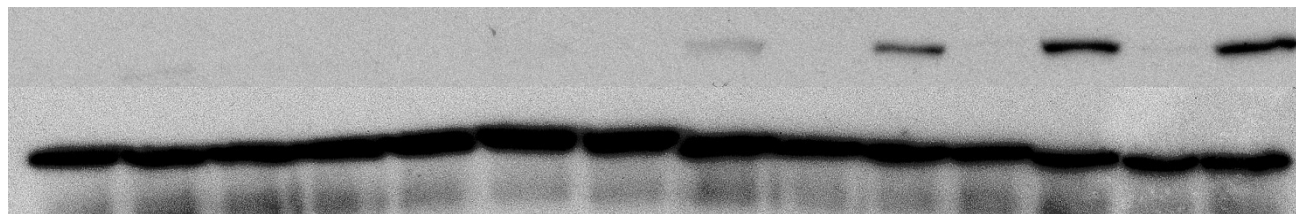

Supplement: MOESM9 [file 9471296]
